# Supplementary material
Source: publisher figshare collection journal article supplement (https://diabetesjournals.figshare.com/ndownloader/files/26361952)
Supplement: Supplementary file 1 [file 26361952]

## Supplementary content

|                                                                                                |    |
|------------------------------------------------------------------------------------------------|----|
| Database management and study protocols .....                                                  | 2  |
| Table S1. Baseline demographics .....                                                          | 3  |
| Table S2. Baseline comorbidities .....                                                         | 3  |
| Table S3. Baseline medications .....                                                           | 5  |
| Table S4. Codes of comorbidities and outcomes .....                                            | 6  |
| Table S5. Classification of drugs .....                                                        | 8  |
| Figures S1. Validation of the T1D definition .....                                             | 9  |
| Figure S2. Age-stratified baseline prevalence of total CV disease.....                         | 11 |
| Figures S3. Event rates for total CV disease in whole cohort .....                             | 12 |
| Figure S4. Age-stratified event rates for all registered diagnoses, beyond main diagnosis..... | 13 |
| Figures S5. Event rates in subjects without CVRD at baseline .....                             | 14 |
| Figures S6. Event rates in subjects with previous CVRD at baseline .....                       | 18 |
| Figure S7. T1D duration and CVRD risk .....                                                    | 22 |
| References .....                                                                               | 23 |

## **Database management and study protocols**

The linked databases were separately managed by Statisticon AB (Uppsala, Sweden). In Sweden (DAISY study database), the study protocol was approved by the Stockholm Regional Ethics Committee (reference number 2013/2206-31), with data linkage performed by the Swedish National Board of Health and Welfare. In Norway (DAPHNE study database), the study protocol was approved by the Regional Ethics Committee, Helse Sør-øst (reference number 11744 REK Sør-øst A) and was authorized by the Norwegian Data Inspectorate (Datatilsynet).

**Table S1. Baseline demographics**

|                     | <b>Type 1 n=59331</b> | <b>Type 2 n=484241</b> |
|---------------------|-----------------------|------------------------|
| <b>Age</b>          | 45.8 (16.5)           | 64.1 (12.4)            |
| <b>Age category</b> |                       |                        |
| <b>18-24</b>        | 7821 (13.2)           | 1859 (0.4)             |
| <b>25-29</b>        | 4745 (8.0)            | 3293 (0.7)             |
| <b>30-34</b>        | 4584 (7.7)            | 5994 (1.2)             |
| <b>35-39</b>        | 5052 (8.5)            | 9924 (2.0)             |
| <b>40-44</b>        | 5815 (9.8)            | 16487 (3.4)            |
| <b>45-49</b>        | 6388 (10.8)           | 26808 (5.5)            |
| <b>50-54</b>        | 5550 (9.4)            | 36944 (7.6)            |
| <b>55-59</b>        | 5101 (8.6)            | 50486 (10.4)           |
| <b>60-64</b>        | 4955 (8.4)            | 66570 (13.7)           |
| <b>65-69</b>        | 4622 (7.8)            | 86826 (17.9)           |
| <b>70-74</b>        | 2750 (4.6)            | 74669 (15.4)           |
| <b>75-79</b>        | 1318 (2.2)            | 59331 (12.3)           |
| <b>80-84</b>        | 630 (1.1)             | 45050 (9.3)            |
| <b>Sex (Female)</b> | 24911 (42.0%)         | 208361 (43.0%)         |

**Table S2. Baseline comorbidities**

|                                                 | Type 1 n=59331 | Type 2 n=484241 |
|-------------------------------------------------|----------------|-----------------|
| CVD                                             | 7913 (13.3%)   | 126769 (26.2%)  |
| Myocardial infarction                           | 2476 (4.2%)    | 41784 (8.6%)    |
| CABG                                            | 1289 (2.2%)    | 16884 (3.5%)    |
| PCI with stent                                  | 2026 (3.4%)    | 35431 (7.3%)    |
| Unstable angina                                 | 1379 (2.3%)    | 22052 (4.6%)    |
| Angina pectoris                                 | 3506 (5.9%)    | 57638 (11.9%)   |
| Heart failure                                   | 1867 (3.1%)    | 36520 (7.5%)    |
| Atrial fibrillation                             | 1706 (2.9%)    | 46626 (9.6%)    |
| Stroke                                          | 2570 (4.3%)    | 45074 (9.3%)    |
| Hemorrhagic                                     | 378 (0.6%)     | 6123 (1.3%)     |
| Ischemic                                        | 1584 (2.7%)    | 28951 (6.0%)    |
| Transient ischemic attack                       | 864 (1.5%)     | 14856 (3.1%)    |
| Peripheral artery disease                       | 2987 (5.0%)    | 28415 (5.9%)    |
| Major organ specific bleeding                   | 1791 (3.0%)    | 25912 (5.4%)    |
| Chronic kidney disease                          | 2530 (4.3%)    | 15985 (3.3%)    |
| Dialysis                                        | 831 (1.4%)     | 2106 (0.4%)     |
| Microvascular complications                     | 42452 (71.6%)  | 134530 (27.8%)  |
| Diabetic mono-/polyneuropathy                   | 7260 (12.2%)   | 14060 (2.9%)    |
| Diabetic eye complications                      | 34752 (58.6%)  | 67402 (13.9%)   |
| Diabetic foot/Peripheral angiopathy             | 4822 (8.1%)    | 14498 (3.0%)    |
| Diabetic kidney disease                         | 5729 (9.7%)    | 11432 (2.4%)    |
| Diabetes with several/unspecified complications | 26365 (44.4%)  | 79994 (16.5%)   |
| Severe hypoglycemia                             | 1762 (3.0%)    | 5349 (1.1%)     |
| Keto-/lactic acidosis                           | 7490 (12.6%)   | 3278 (0.7%)     |
| Cancer                                          | 2237 (3.8%)    | 45505 (9.4%)    |
| COPD                                            | 949 (1.6%)     | 22755 (4.7%)    |
| Lower limb amputations                          | 586 (1.0%)     | 1771 (0.4%)     |

**Table S3. Baseline medications**

|                                                 | Type 1 n=59331 | Type 2 n=484241 |
|-------------------------------------------------|----------------|-----------------|
| <b>Diabetes medication</b>                      | 59331 (100.0%) | 423747 (87.5%)  |
| Metformin                                       | 2043 (3.4%)    | 344651 (71.2%)  |
| Sulfonylureas                                   | 57 (0.1%)      | 89733 (18.5%)   |
| DPP4 inhibitors                                 | 224 (0.4%)     | 34722 (7.2%)    |
| SGLT-2 inhibitors                               | 30 (0.1%)      | 2021 (0.4%)     |
| GLP-1 receptor agonists                         | 312 (0.5%)     | 17677 (3.7%)    |
| Meglitinides                                    | 7 (0.0%)       | 10769 (2.2%)    |
| Thiazolidinediones                              | 13 (0.0%)      | 4846 (1.0%)     |
| Acarbose                                        | 10 (0.0%)      | 1783 (0.4%)     |
| Insulin                                         | 59331 (100.0%) | 134350 (27.7%)  |
| Short-acting                                    | 59331 (100.0%) | 45512 (9.4%)    |
| Intermediate-acting (isophane)                  | 11325 (19.1%)  | 70544 (14.6%)   |
| Premixed insulin                                | 1054 (1.8%)    | 41549 (8.6%)    |
| Long-acting                                     | 40886 (68.9%)  | 29866 (6.2%)    |
| Metformin+DPP-4 inhibitors                      | 60 (0.1%)      | 18246 (3.8%)    |
| Metformin+Meglitinides                          | 0 (0.0%)       | 178 (0.0%)      |
| <b>CVD risk treatment</b>                       | 31961 (53.9%)  | 397795 (82.1%)  |
| Low dose aspirin                                | 11530 (19.4%)  | 172529 (35.6%)  |
| Statins                                         | 23782 (40.1%)  | 281159 (58.1%)  |
| Antihypertensives                               | 24604 (41.5%)  | 348975 (72.1%)  |
| ACE inhibitors                                  | 13367 (22.5%)  | 154744 (32.0%)  |
| ARB                                             | 9932 (16.7%)   | 151619 (31.3%)  |
| Dihydropyridines (calcium channel blockers)     | 8635 (14.6%)   | 139554 (28.8%)  |
| Low ceiling diuretics (thiazides)               | 1165 (2.0%)    | 31373 (6.5%)    |
| Beta blockers                                   | 9555 (16.1%)   | 189772 (39.2%)  |
| Non-dihydropyridines (calcium channel blockers) | 249 (0.4%)     | 5385 (1.1%)     |
| High ceiling diuretics (loop diuretics)         | 5430 (9.2%)    | 74346 (15.4%)   |
| Aldosterone antagonists                         | 986 (1.7%)     | 21698 (4.5%)    |
| Digoxin                                         | 184 (0.3%)     | 10510 (2.2%)    |
| Flecainide                                      | 44 (0.1%)      | 754 (0.2%)      |
| Amiodarone                                      | 61 (0.1%)      | 1588 (0.3%)     |
| Warfarin                                        | 1246 (2.1%)    | 37011 (7.6%)    |
| P2Y12 receptor antagonists                      | 1561 (2.6%)    | 20066 (4.1%)    |
| Direct factor Xa inhibitors                     | 127 (0.2%)     | 2563 (0.5%)     |
| Direct thrombin inhibitor                       | 110 (0.2%)     | 2738 (0.6%)     |
| Other antiplatelet drugs                        | 412 (0.7%)     | 5950 (1.2%)     |
| Weight loss drugs                               | 139 (0.2%)     | 3162 (0.7%)     |

**Table S4. Codes of comorbidities and outcomes**

| Disease                                | ICD 10                                                                                   | Surgical code/medication                    |
|----------------------------------------|------------------------------------------------------------------------------------------|---------------------------------------------|
| <b>CVRD (includes all codes below)</b> |                                                                                          |                                             |
| Myocardial infarction                  | I21-I22, I25.2, I25.6                                                                    |                                             |
| <b>Heart failure (total)</b>           | I50, I11.0, I13.0, I13.2                                                                 |                                             |
| Heart failure                          | I50                                                                                      |                                             |
| Heart failure - hypertensive           | I11.0, I13.0, I13.2                                                                      |                                             |
| <b>CKD (total)</b>                     | N17-N19, I12.0-I12.9, I13.1, I13.2, N08.3, E10.2, E11.2, E12.2, E13.2, E14.2, Z49, Z99.2 | JAK10, TJA20, TJA33, DJ008, DR015-24, QF006 |
| CKD - Acute                            | N17                                                                                      |                                             |
| CKD - Chronic                          | N18                                                                                      |                                             |
| CKD - Unspecified                      | N19                                                                                      |                                             |
| CKD - Diabetic                         | E10.2, E11.2, E12.2, E13.2, E14.2, N08.3                                                 |                                             |
| CKD - Hypertensive                     | I12.0-I12.9, I13.1, I13.2                                                                |                                             |
| CKD - Dialysis                         | Z49, Z99.2                                                                               | JAK10, TJA20, TJA33, DJ008, DR015-24, QF006 |
| Atrial fibrillation                    | I48                                                                                      |                                             |
| Stroke                                 | I60-I66, G45                                                                             |                                             |
| Hemorrhagic                            | I60-I62                                                                                  |                                             |
| Ischemic                               | I63                                                                                      |                                             |
| Peripheral artery disease              | I70.2, I73.9, I74.2-9                                                                    |                                             |
| Dialysis                               | Z49, Z99.2                                                                               | JAK10, TJA20, TJA33, DJ008, DR015-24, QF006 |
| <b>Microvascular complications</b>     |                                                                                          |                                             |
| Diabetic mono-/polyneuropathy          | G99.0, G59.0, G63.2, E10.4, E11.4, E12.4, E13.4, E14.4                                   |                                             |
| Diabetic eye complications             | H360, H351, H350, E103, E113, E123, E133, E143                                           | CKC12, CKD65                                |
| Diabetic foot/Peripheral angiopathy    | E11.6B, M14.2, M14.6, M90.8, L98.4, E10.5, E11.5, E12.5, E13.5, E14.5                    | QDGX10                                      |
| Diabetic kidney disease                | N08.3, E10.2, E11.2, E12.2, E13.2, E14.2                                                 |                                             |

---

|                                                  |                                                                                                         |          |
|--------------------------------------------------|---------------------------------------------------------------------------------------------------------|----------|
| Diabetes with several-/unspecified complications | E11.6, E10.6, E13.6, E14.6, E10.7, E11.7, E12.7, E13.7, E14.7, E10.8, E11.8, E12.0, E12.8, E13.8, E14.8 |          |
| Severe hypoglycemia                              | E10.0, E11.0, E12.0, E13.0, E14.0, E11.6A, E16.0-2                                                      |          |
| Keto-/lactate acidosis                           | E10.1, E11.1, E12.1, E13.1, E14.1, E87.2                                                                |          |
| Cancer                                           | C00-C99                                                                                                 |          |
| COPD                                             | J44                                                                                                     |          |
| Lower limb amputations                           |                                                                                                         | NGQ, NHQ |

---

**Table S5. Classification of drugs**

| Drug class                            | ATC code                                                                                                                                                         |
|---------------------------------------|------------------------------------------------------------------------------------------------------------------------------------------------------------------|
| <b>Glucose lowering drugs</b>         |                                                                                                                                                                  |
| SGLT-2 inhibitors                     | A10BX09, A10BX11, A10BX12 or A10BD15, A10BD16, A10BD20 (in combination)                                                                                          |
| Metformin                             | A10BA01, A10BA03, A10BA02, A10BD02, A10BD03, A10BD05, A10BD07, A10BD08, A10BD10, A10BD11, A10BD13, A10BD14, A10BD15, A10BD16, A10BD17, A10BD18, A10BD20, A10BD31 |
| Sulfonylureas                         | A10BB, A10BD01, A10BD02, A10BD31                                                                                                                                 |
| DPP-4 inhibitors                      | A10BH, A10BD07, A10BD08, A10BD10, A10BD11, A10BD12, A10BD13                                                                                                      |
| GLP-1RA                               | A10BJ                                                                                                                                                            |
| Meglitinides                          | A10BX02, A10BX03, A10BD03, A10BD04, A10BD05                                                                                                                      |
| Thiazolidinediones                    | A10BG, A10BD05 (in combination)                                                                                                                                  |
| Acarbose                              | A10BF                                                                                                                                                            |
| Insulins                              |                                                                                                                                                                  |
| <i>Short-acting</i>                   | A10AB                                                                                                                                                            |
| <i>Intermediate-acting (isophane)</i> | A10AC                                                                                                                                                            |
| <i>Premixed insulin</i>               | A10AD                                                                                                                                                            |
| <i>Long-acting</i>                    | A10AE                                                                                                                                                            |
| <b>CV preventive drugs</b>            |                                                                                                                                                                  |
| Low dose aspirin                      | B01AC06, B01AC56, C10BX01, C10BX02, C10BX04, C10BX05, C10BX06, C10BX08, C10BX12, C07FX02, C07FX03, C07FX04, B01AC86, B01AC56, B01AC36, B01AC34                   |
| Statins                               | C10AA, C10BA, C10BX, A10BH51                                                                                                                                     |
| Antihypertensives                     | 09A, C09B, C09C, C90D, C08C, C03A, C07, except C09DX04                                                                                                           |
| Loop diuretics                        | C03C                                                                                                                                                             |
| Aldosterone antagonists               | C03DA                                                                                                                                                            |
| Warfarin                              | B01AA03                                                                                                                                                          |



## Figures S1. Validation of the T1D definition

**Figure S1A. Prevalence of subjects with diabetes in Sweden according to Swedish National Diabetes Register data<sup>1</sup> and proportion of T1D among subjects**

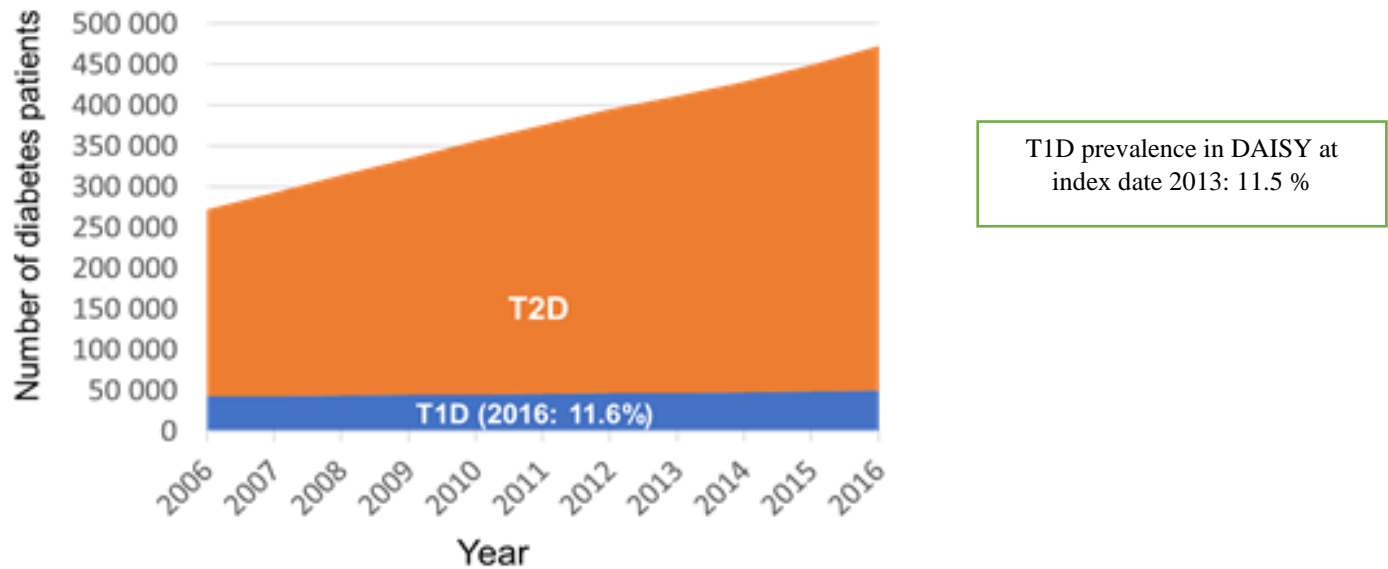

**Figure S1B. Incidence of new T1D cases according to Swedish National Diabetes Register data<sup>2</sup> and in the DAISY database**

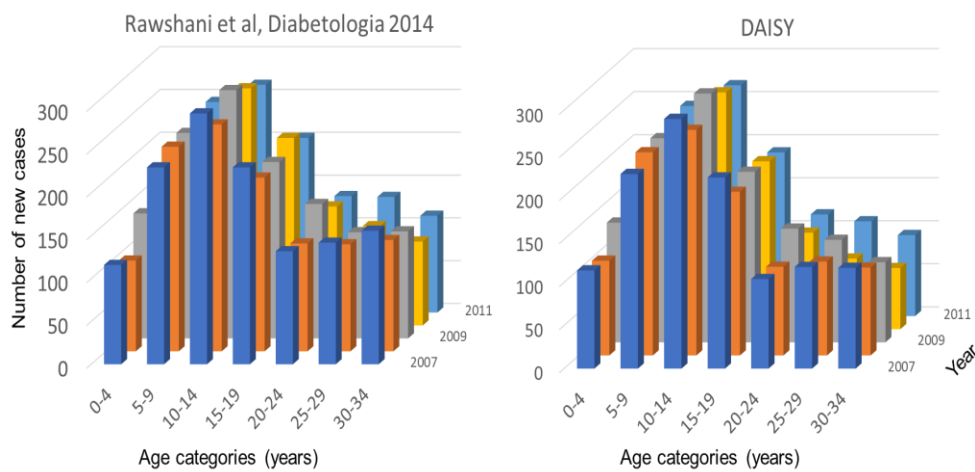

**Figure S1C. Age distribution among subjects with T1D in Sweden according to Swedish National Diabetes Register data<sup>1</sup> and according to DAISY data in 2016**

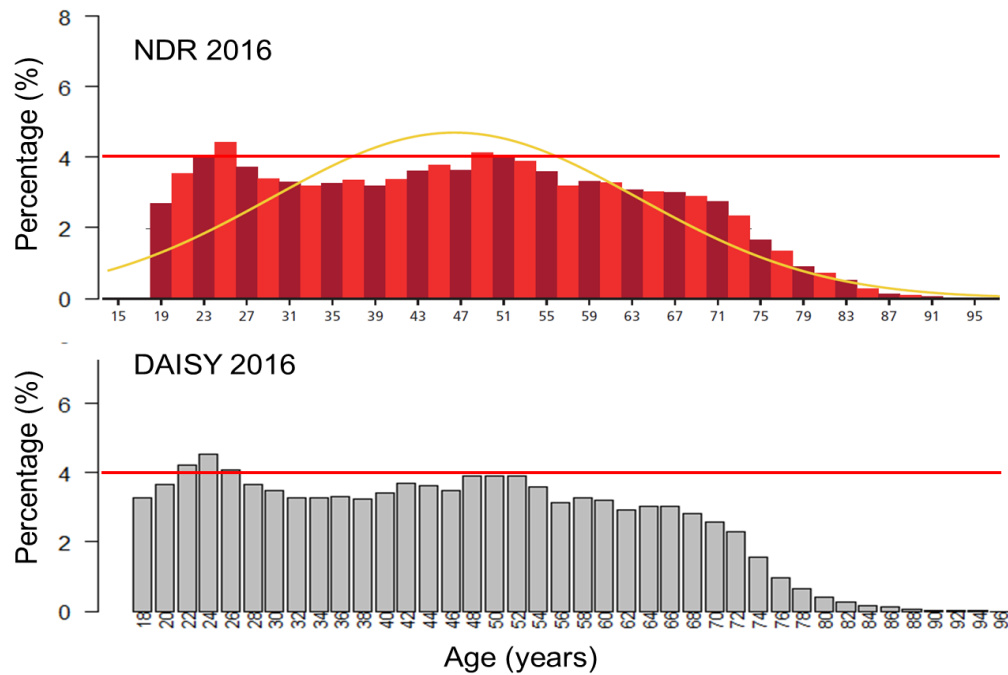

**Figure S1D. Median age at T1D diagnosis according to Swedish National Diabetes Register data 2006-2016<sup>1</sup>**

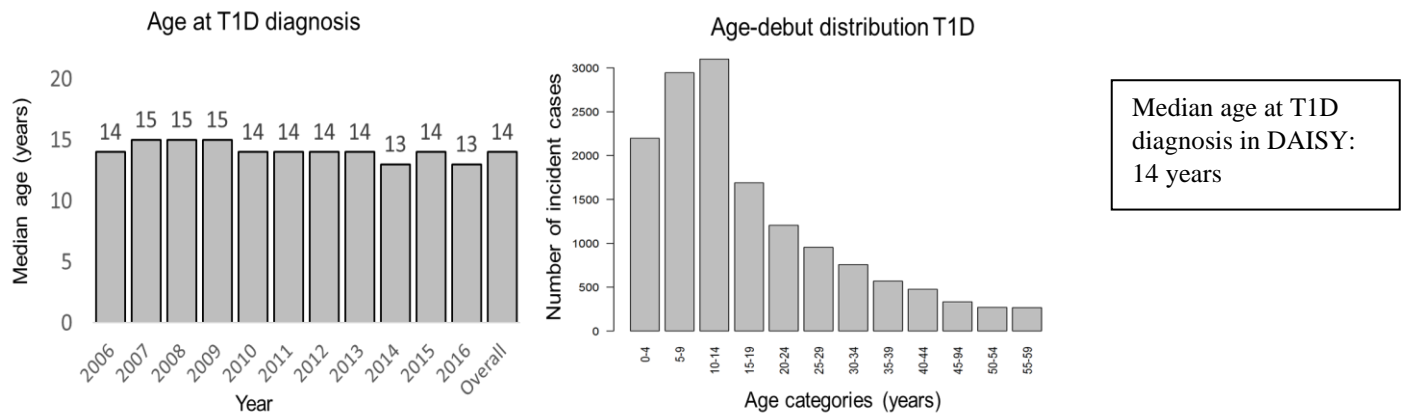

**Figure S2. Age-stratified baseline prevalence of total CV disease**

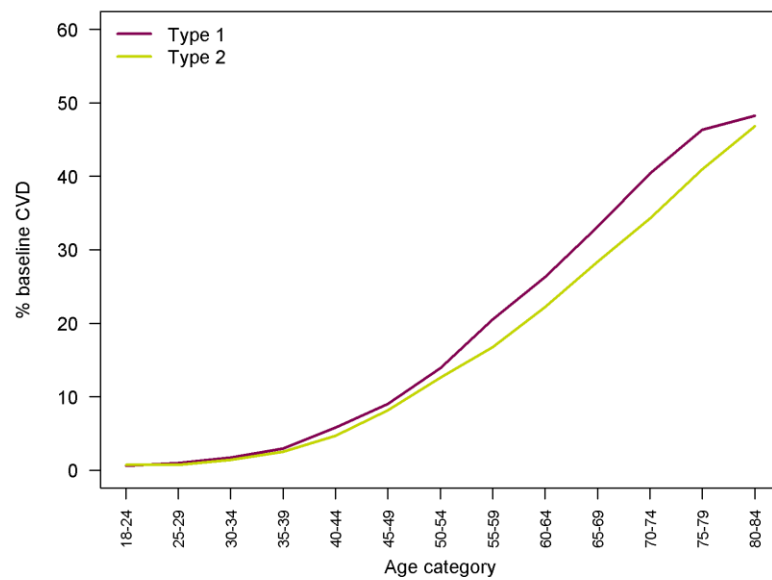

**Figure S2. Age-stratified prevalence of total CV disease for T1D and T2D at baseline December 31<sup>st</sup> 2013**

**Figures S3. Event rates for total CV disease in whole cohort**

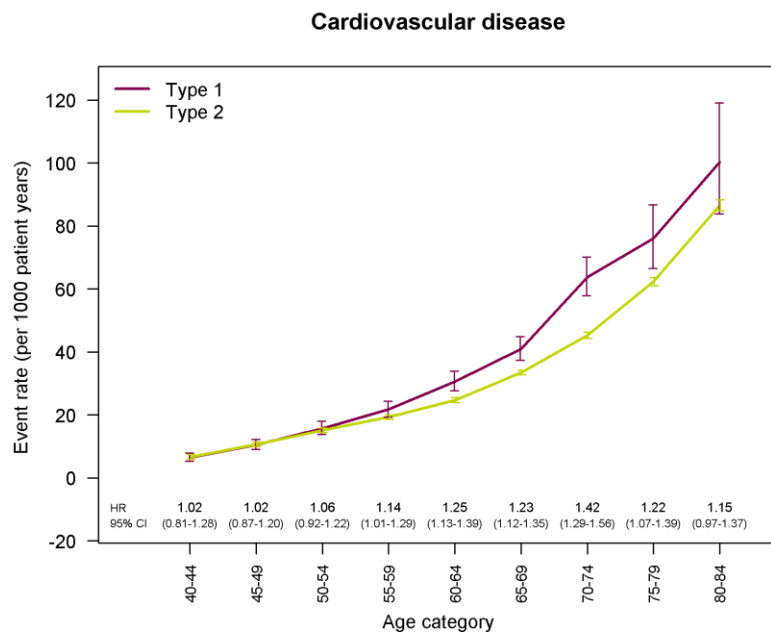

**Figure S3. Event rates for total cardiovascular disease in whole cohort with HR values for T1D vs T2D for each age category**

**Figure S4. Age-stratified event rates for all registered diagnoses, beyond main diagnosis**

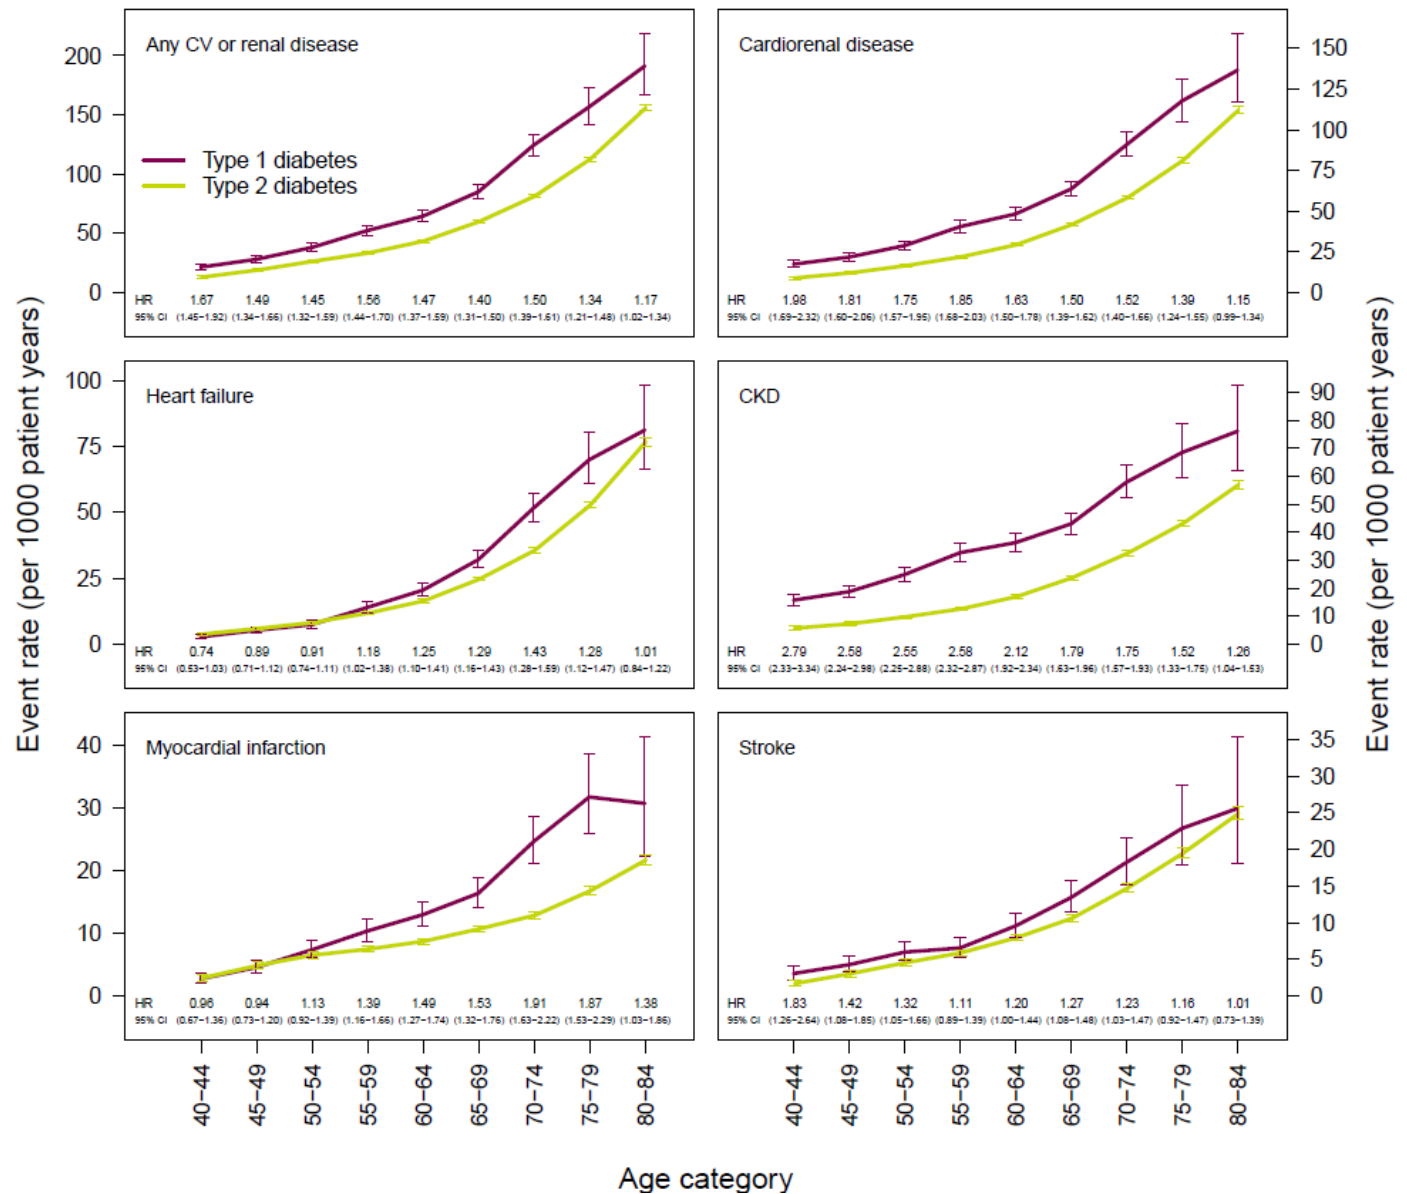

**Figure S4. Age-stratified incidence of heart failure (HF), chronic kidney disease (CKD), stroke, myocardial infarction (MI), cardiorenal disease (HF or CKD) and any cardiovascular or renal disease (CVRD; MI, stroke, CV death, HF or CKD) for all registered diagnoses, beyond main diagnosis**

**Figures S5. Event rates in subjects without CVRD at baseline**

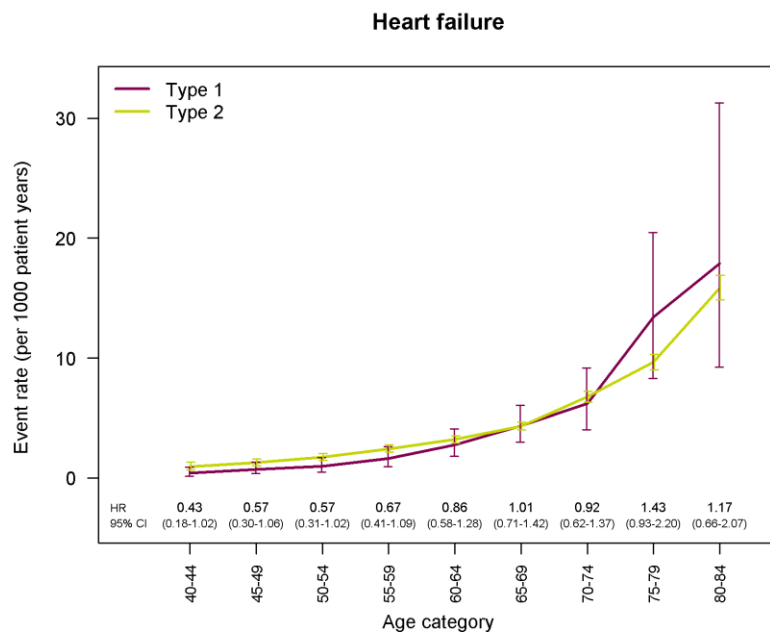

**Figure S5A. Event rates for heart failure with HR values for T1D vs T2D for each age category in subjects without CVRD at baseline**

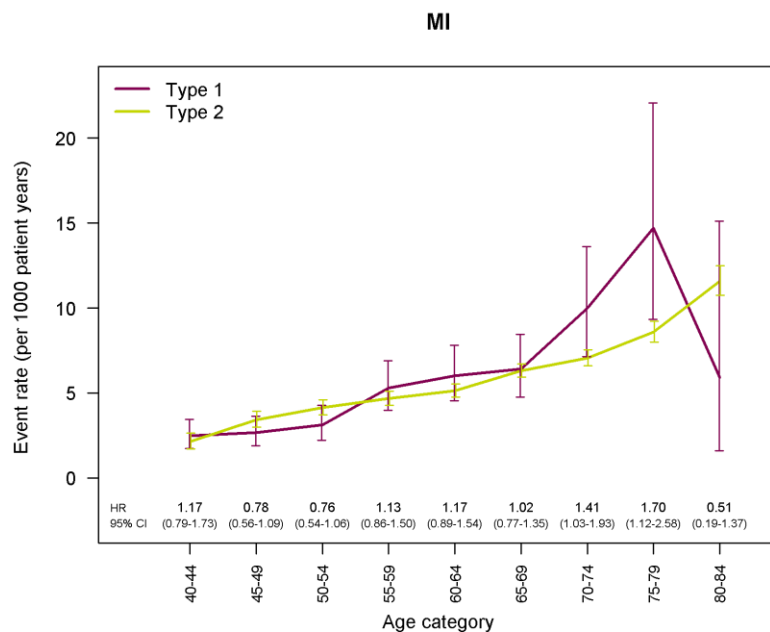

**Figure S5B. Event rates for MI with HR values for T1D vs T2D for each age category in subjects without CVRD at baseline**

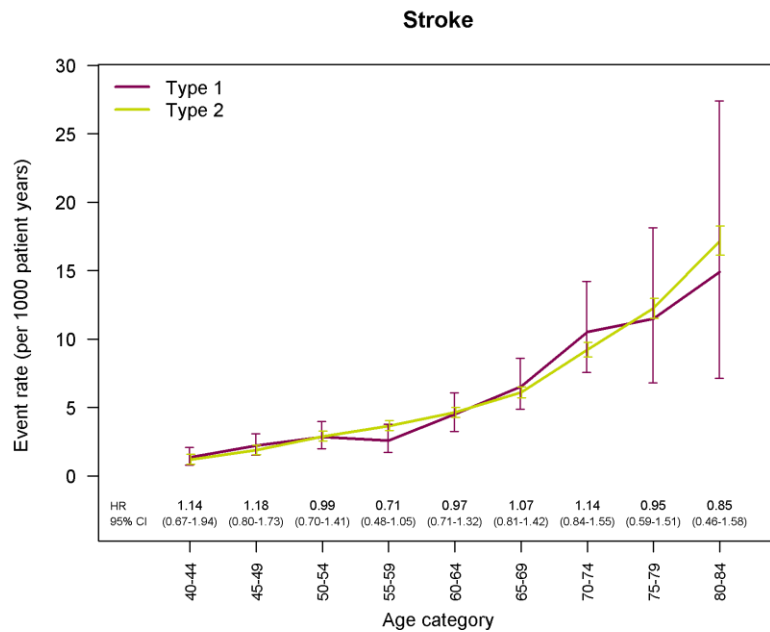

**Figure S5C. Event rates for stroke with HR values for T1D vs T2D for each age category in subjects without CVRD at baseline**

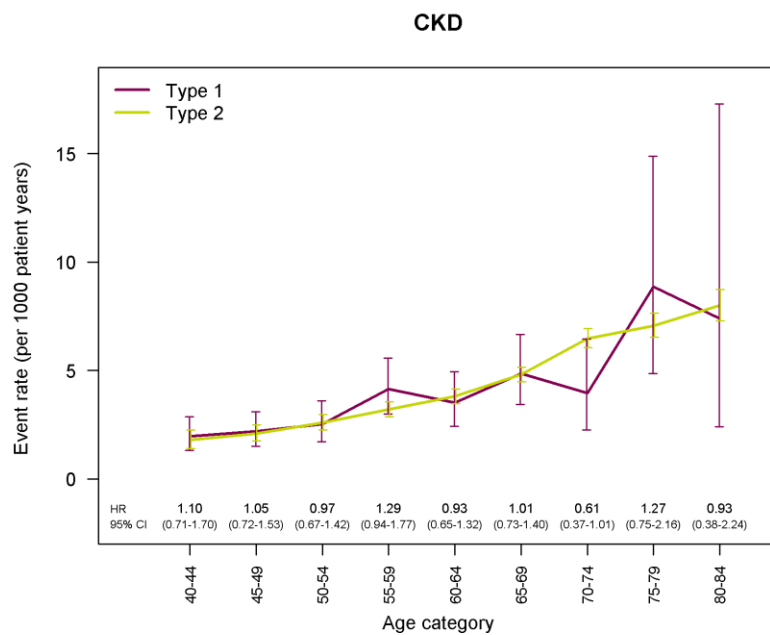

**Figure S5D. Event rates for CKD with HR values for T1D vs T2D for each age category in subjects without CVRD at baseline**

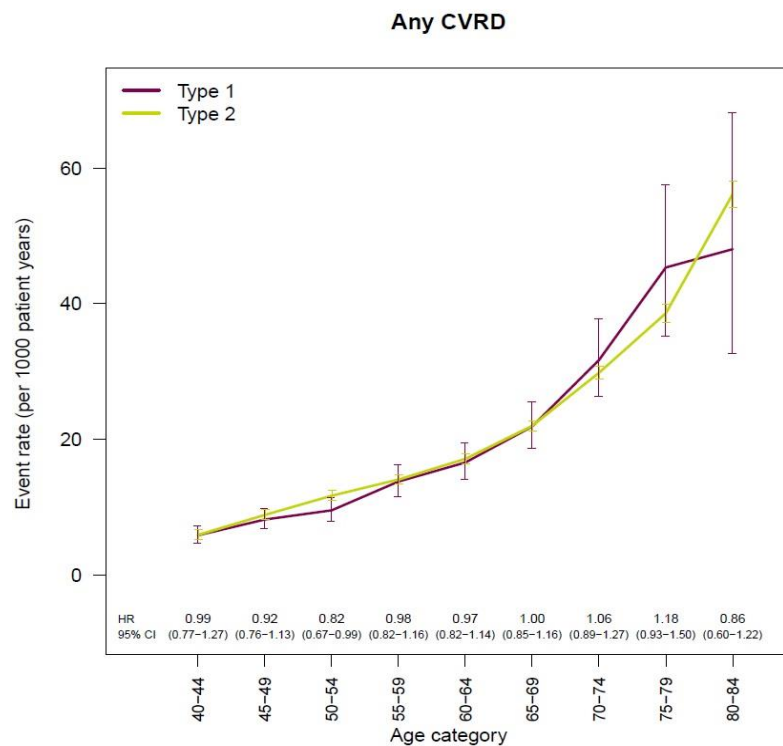

**Figure S5E. Event rates for any CVRD with HR values for T1D vs T2D for each age category in subjects without CVRD at baseline**

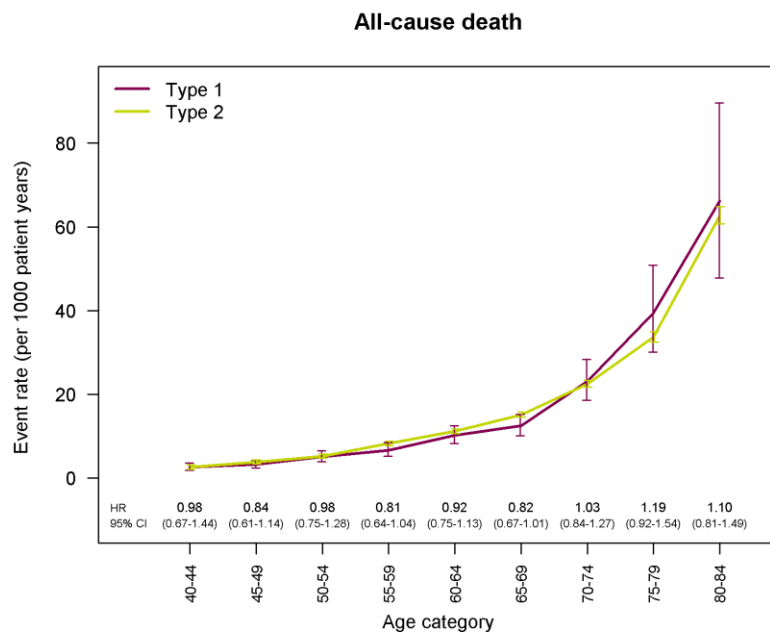

**Figure S5F. Event rates for all-cause death with HR values for T1D vs T2D for each age category in subjects without CVRD at baseline**



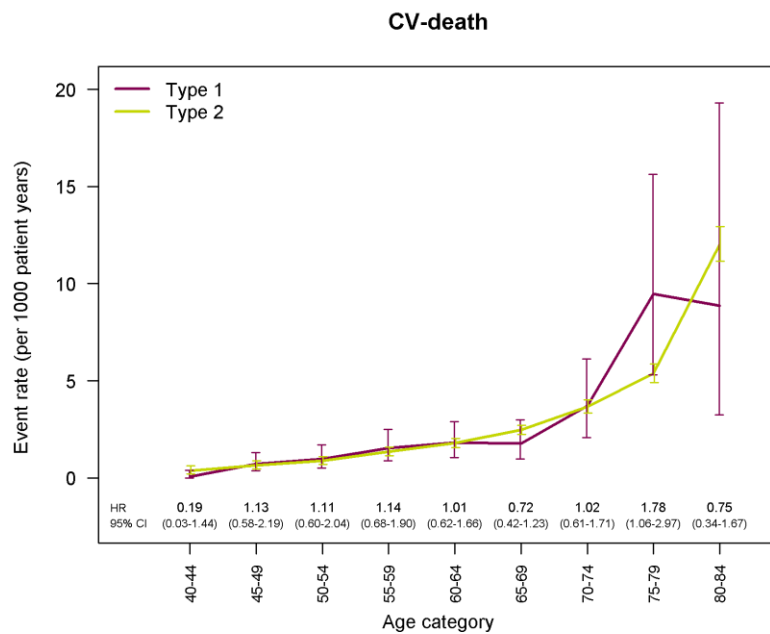

**Figure S5G. Event rates for CV death with HR values for T1D vs T2D for each age category in subjects without CVRD at baseline**

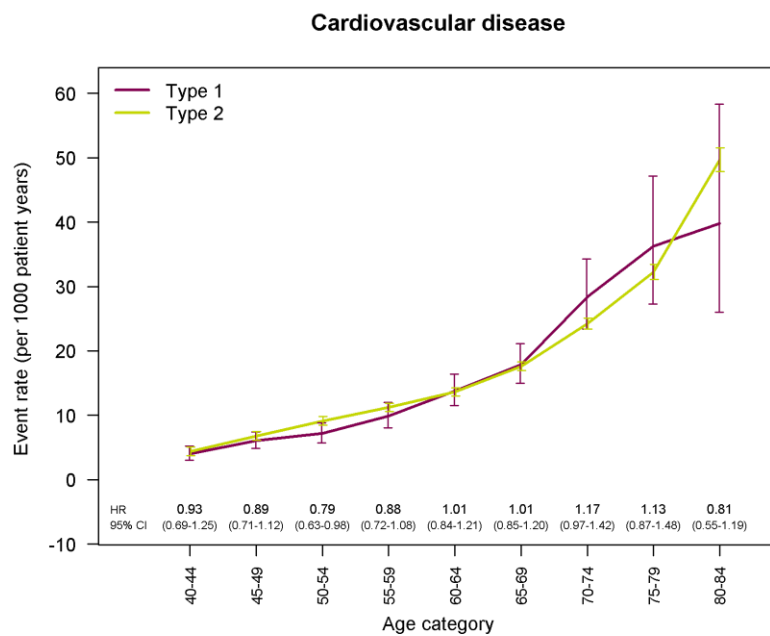

**Figure S5H. Event rates for total cardiovascular disease with HR values for T1D vs T2D for each age category in subjects without CVRD at baseline**

**Figures S6. Event rates in subjects with previous CVRD at baseline**

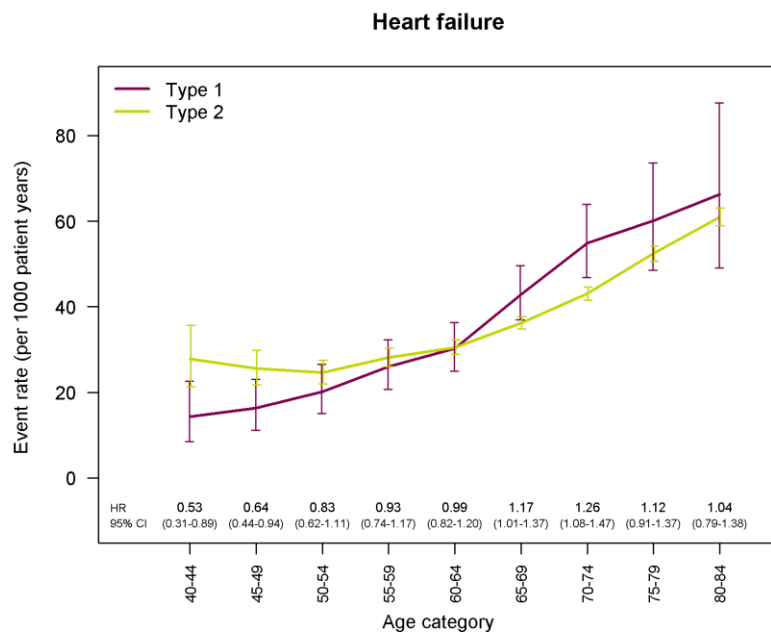

**Figure S6A. Event rates for heart failure with HR values for T1D vs T2D for each age category in subjects with previous CVRD at baseline**

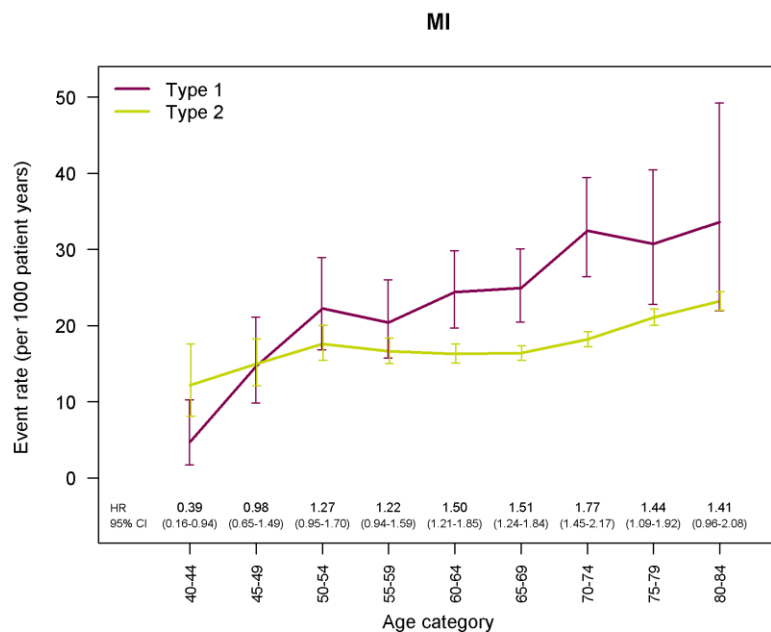

**Figure S6B. Event rates for MI with HR values for T1D vs T2D for each age category in subjects with previous CVRD at baseline**

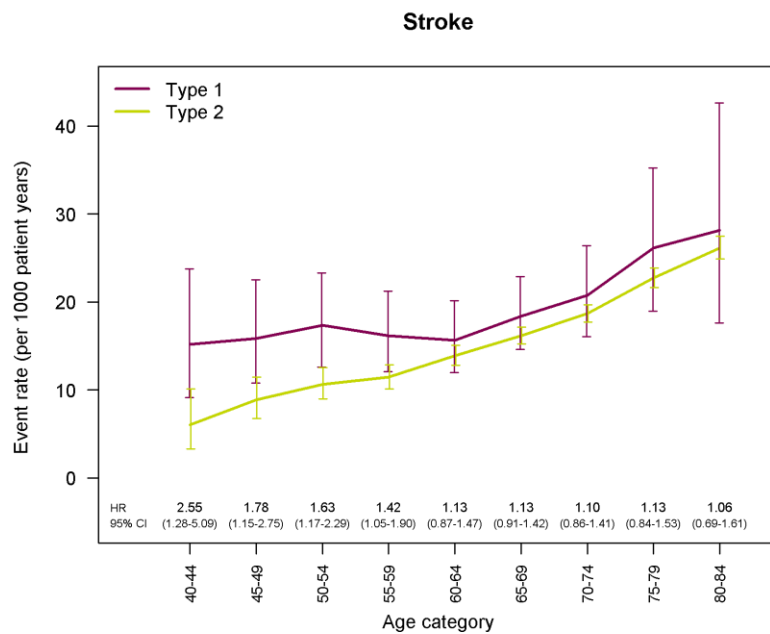

**Figure S6C.** Event rates for stroke with HR values for T1D vs T2D for each age category in subjects with previous CVRD at baseline

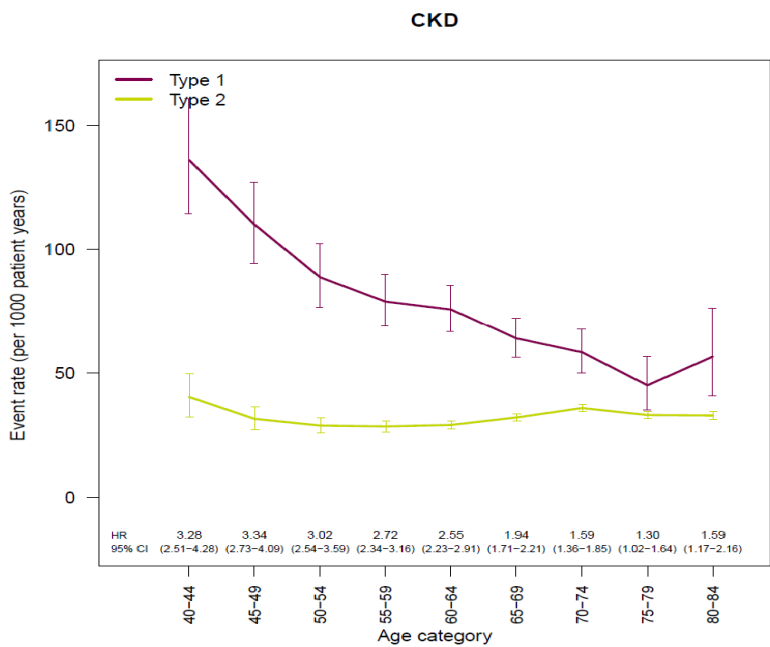

**Figure S6D.** Event rates for CKD with HR values for T1D vs T2D for each age category in subjects with previous CVRD at baseline

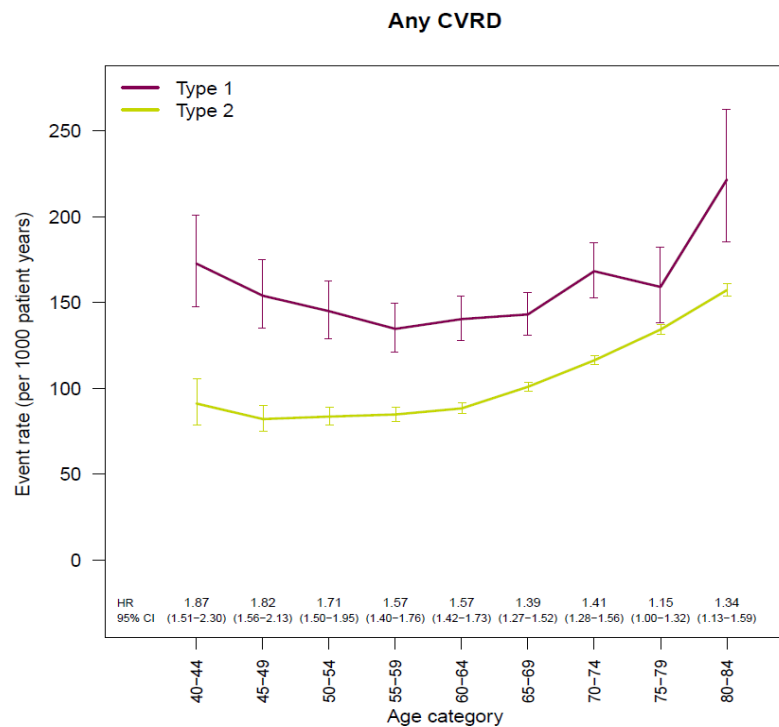

**Figure S6E. Event rates for any CVRD with HR values for T1D vs T2D for each age category in subjects with previous CVRD at baseline**

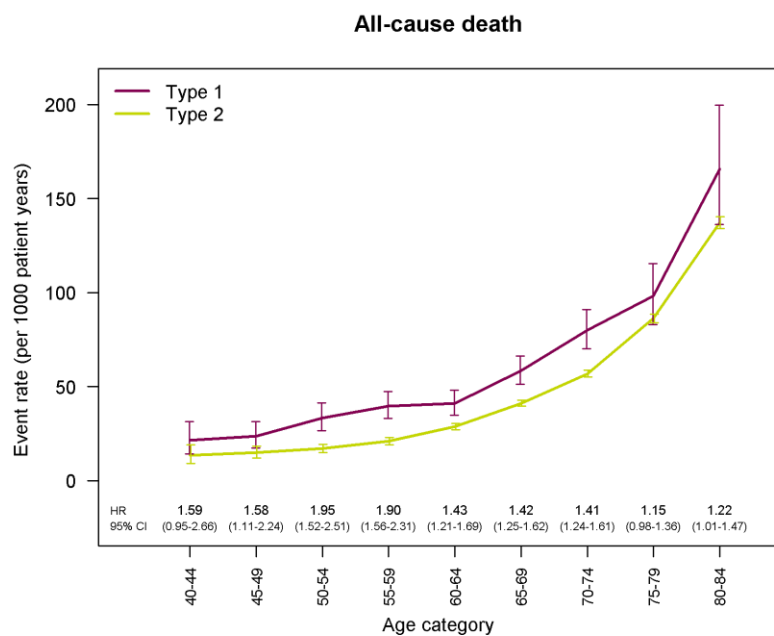

**Figure S6F. Event rates for all-cause death with HR values for T1D vs T2D for each age category in subjects with previous CVRD at baseline**

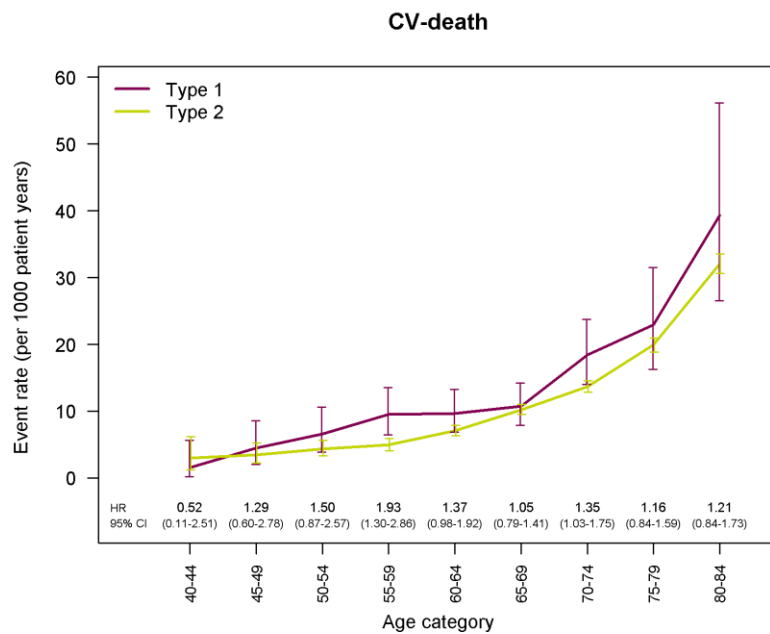

**Figure S6G. Event rates for CV death with HR values for T1D vs T2D for each age category in subjects with previous CVRD at baseline**

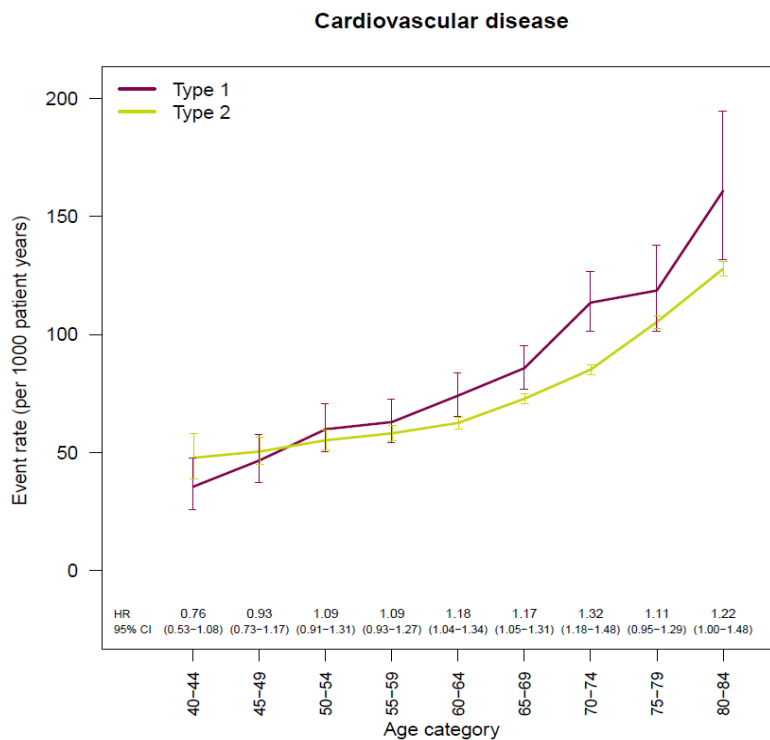

**Figure S6H. Event rates for total cardiovascular disease with HR values for T1D vs T2D for each age category in subjects with previous CVRD at baseline**

**Figure S7. T1D duration and CVRD risk**

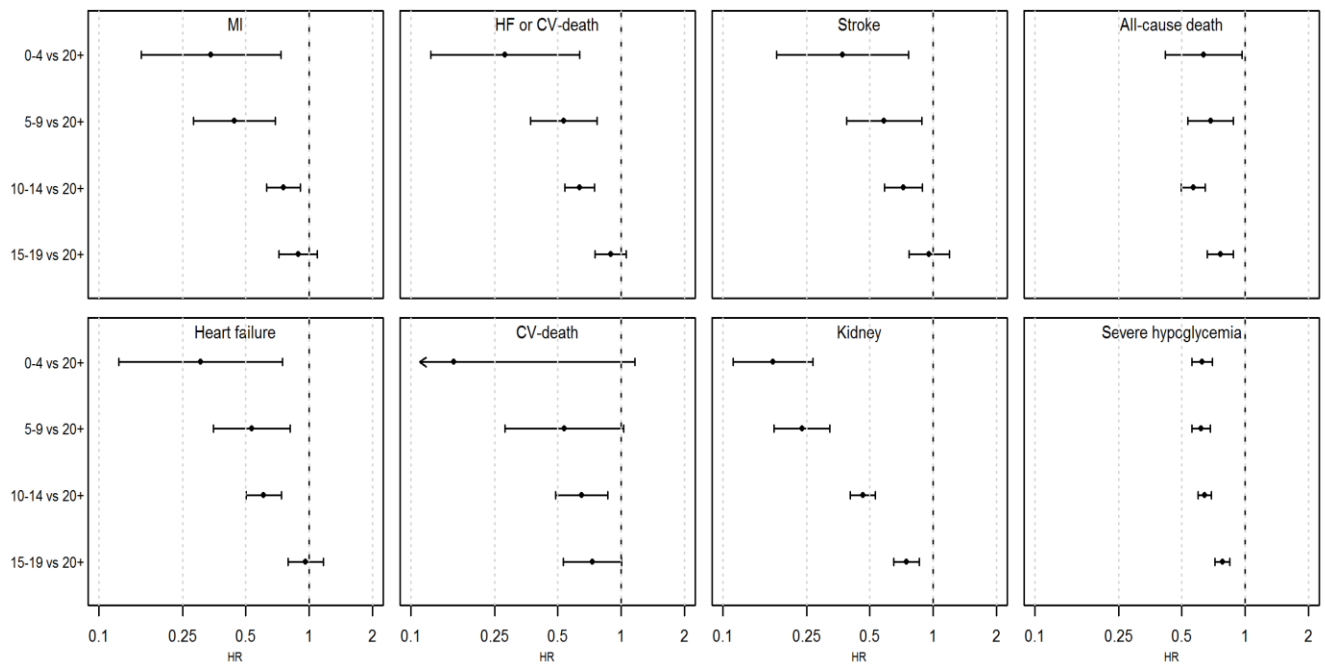

**Figure S7. T1D duration in years and age-adjusted risk of CVRD at baseline in Sweden 2013 (reference is duration >20 years). Severe hypoglycemia included as a comparison.**

## References

- 1 Swedish National Diabetes Register Annual Report 2017. Available on: [https://www.ndr.nu/pdfs/Arsrapport\\_NDR\\_2017.pdf](https://www.ndr.nu/pdfs/Arsrapport_NDR_2017.pdf). Accessed: 19.10.2018. .
- 2 Rawshani A, Landin-Olsson M, Svensson AM, *et al.* The incidence of diabetes among 0-34 year olds in Sweden: New data and better methods. *Diabetologia* 2014; **57**: 1375–81.
